# Supplementary figures and images for: Transcriptome Shock in Developing Embryos of a Brassica napus and Brassica rapa Hybrid
Source: MDPI journal article supplement (doi:10.3390/ijms242216238), 2023-11-12

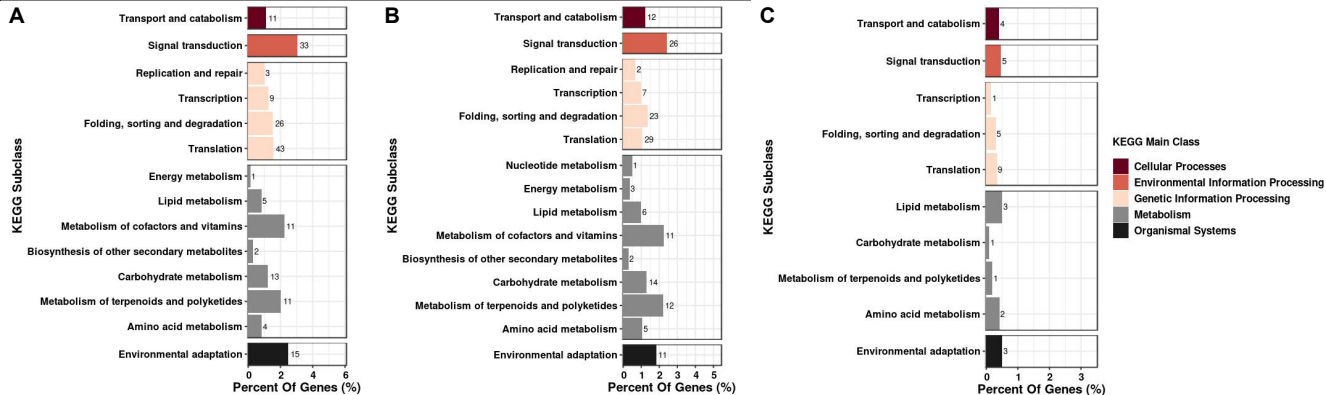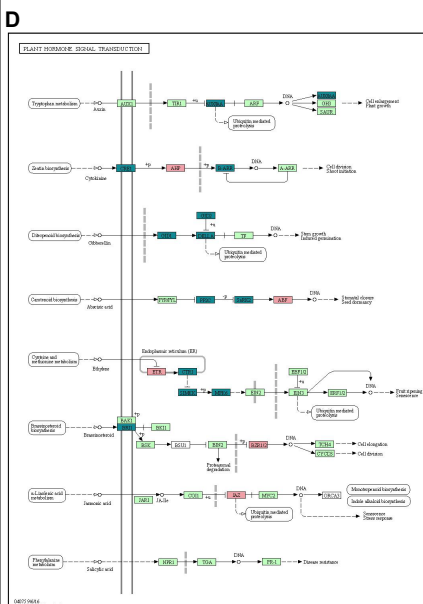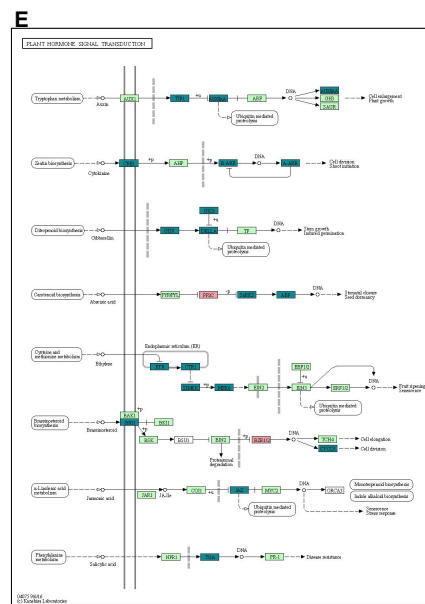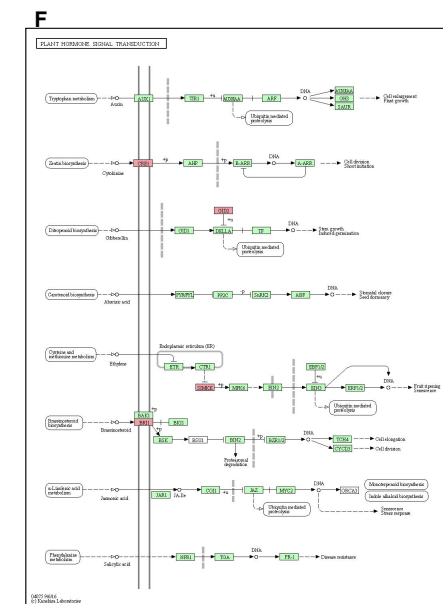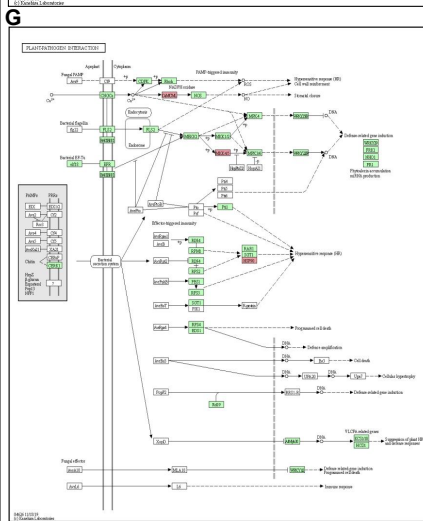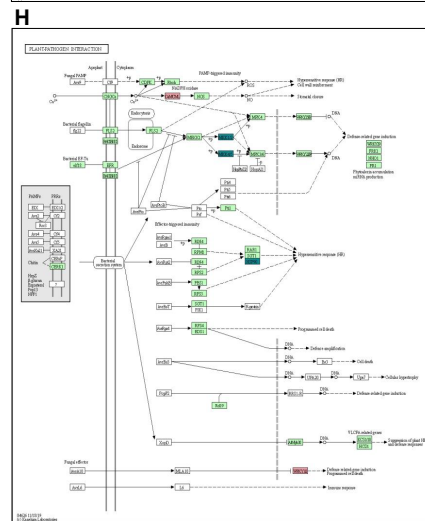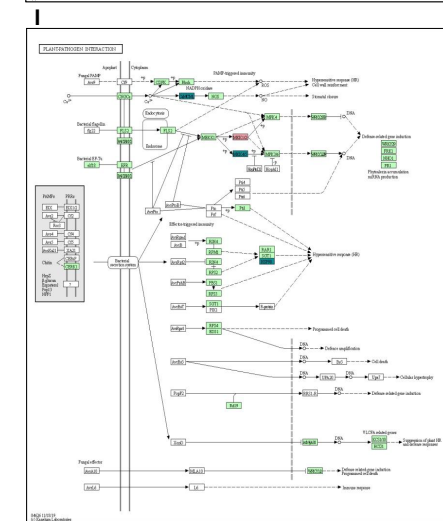

Supplement: s1 [file s1]

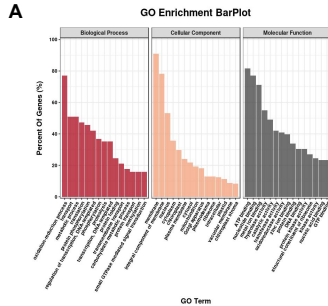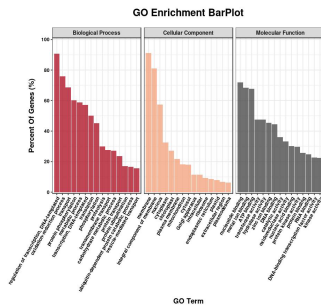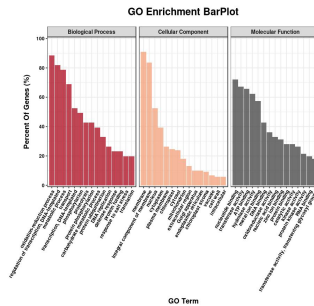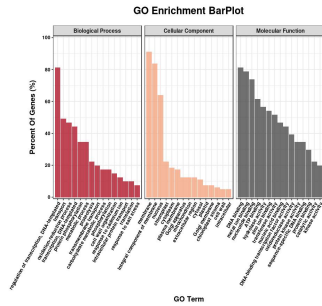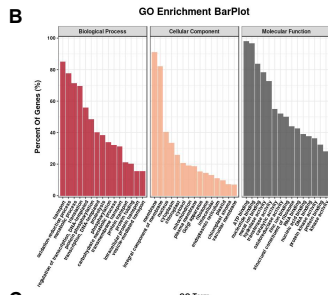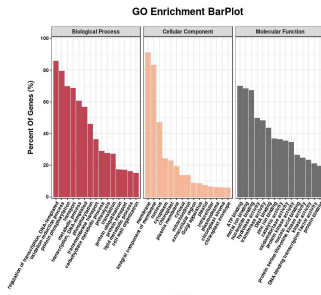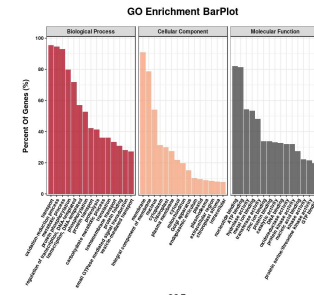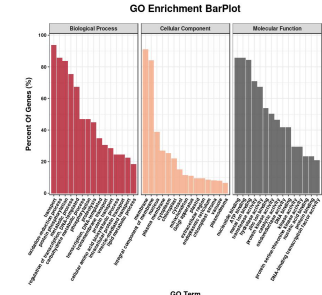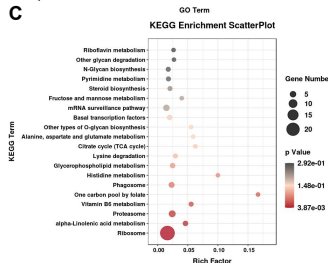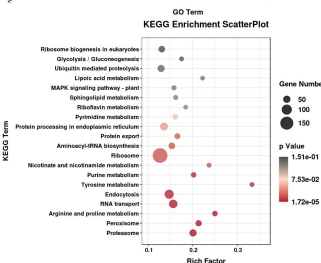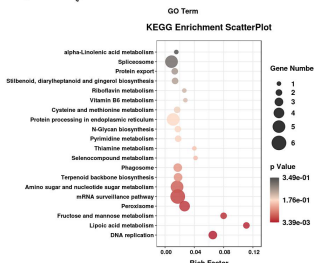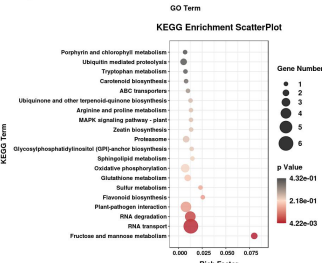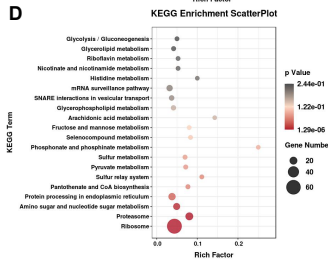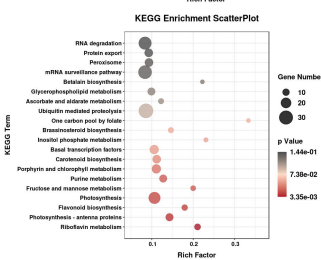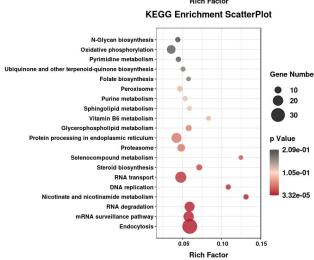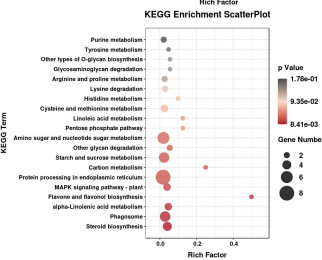

Supplement: s1 [file s1]

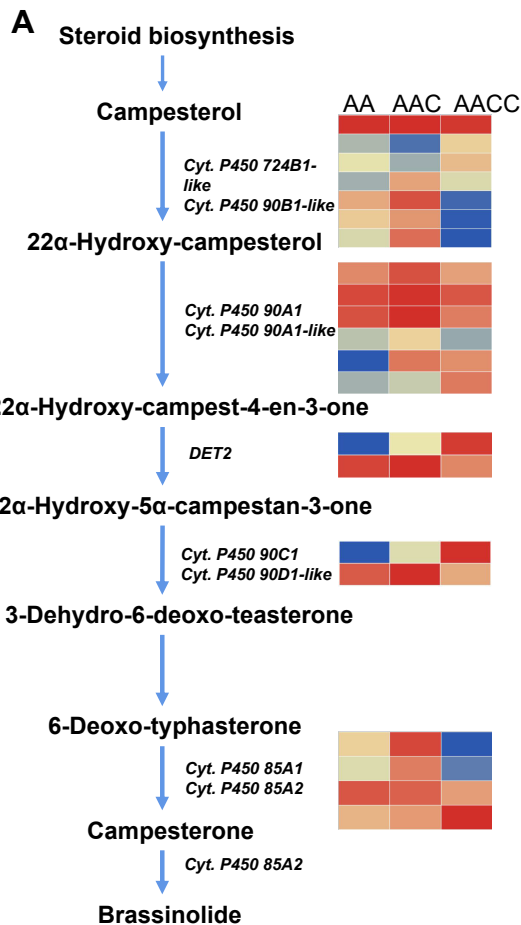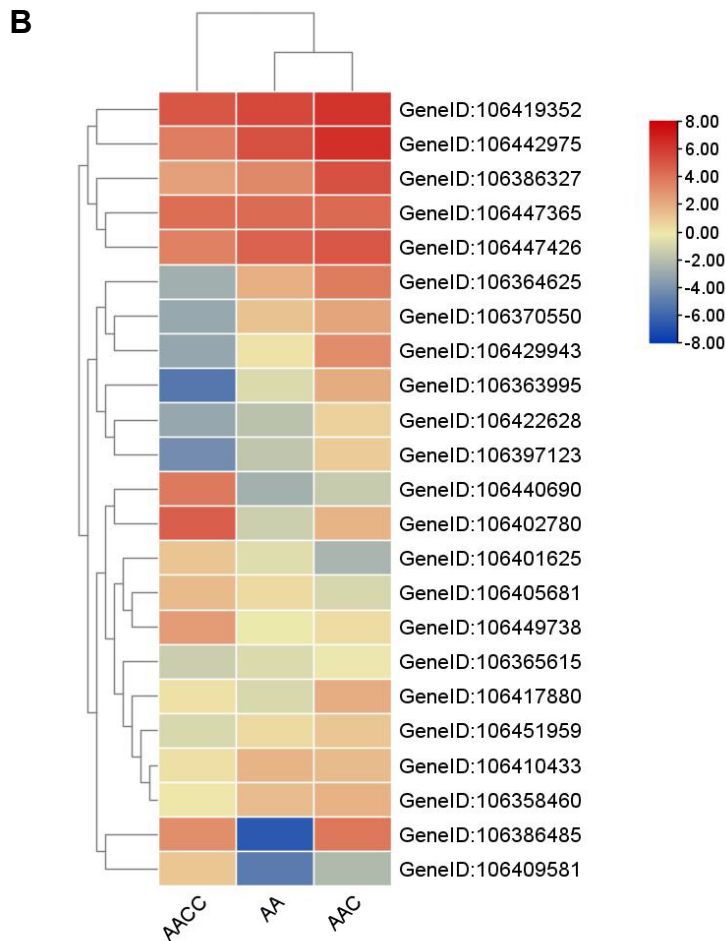

Supplement: s1 [file s1]
